# Supplementary material
Source: PubMed Central journal article supplement (PMC3648040)

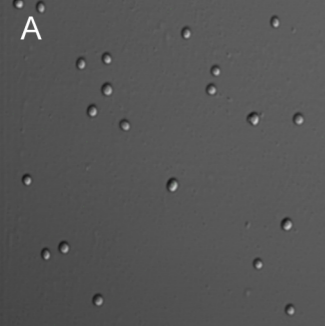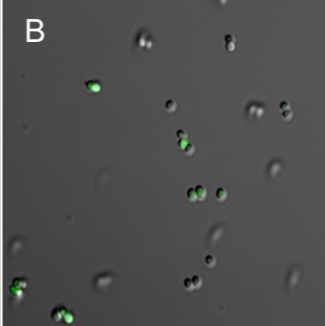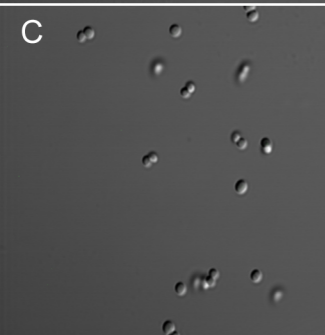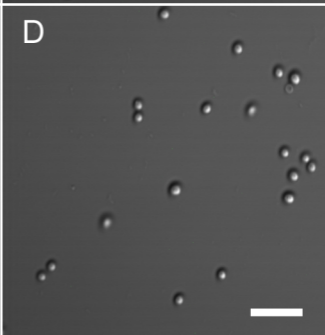

Supplement: AEM.00395-13_zam999104403so1.pdf [file AEM.00395-13_zam999104403so1.pdf]

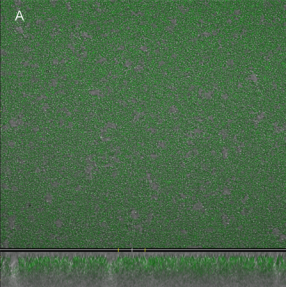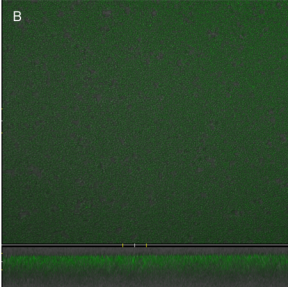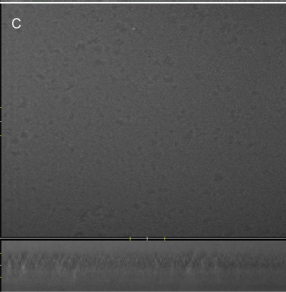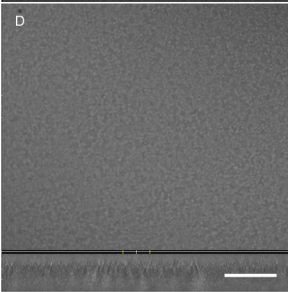

Supplement: AEM.00395-13_zam999104403so2.pdf [file AEM.00395-13_zam999104403so2.pdf]

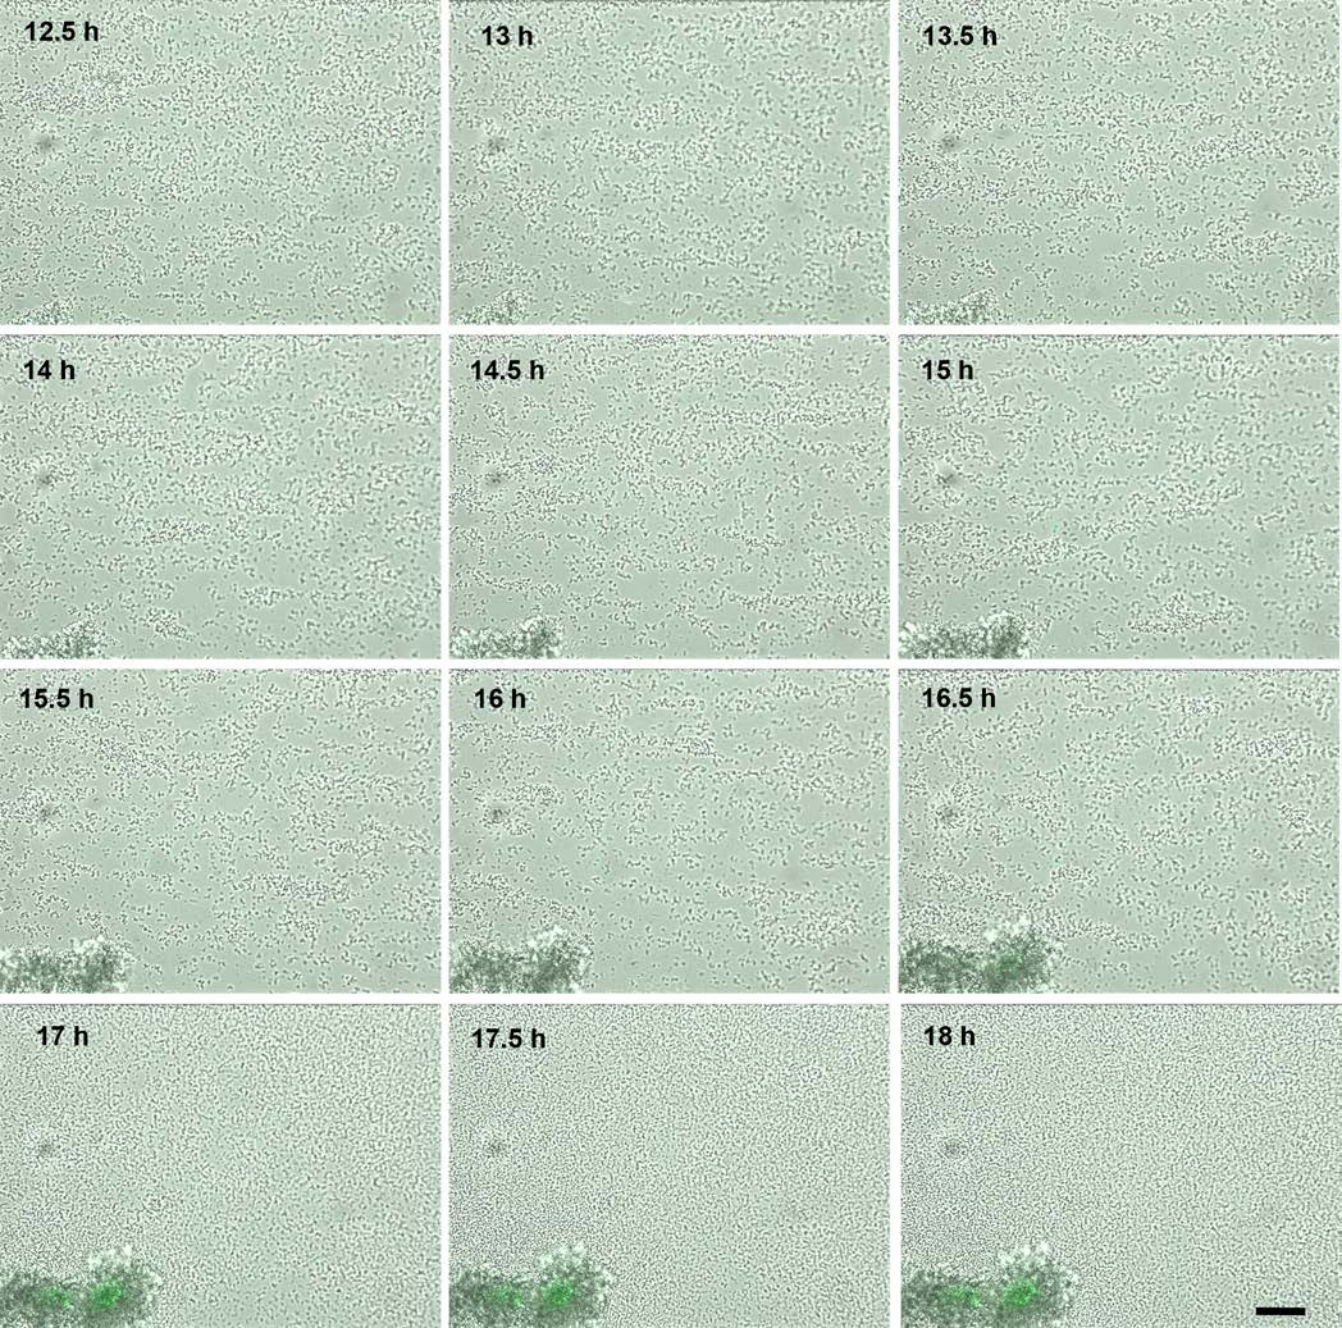

Supplement: AEM.00395-13_zam999104403so3.pdf [file AEM.00395-13_zam999104403so3.pdf]
